# Supplementary material
Source: PubMed Central journal article supplement (PMC5567997)

## Appendix

**Supplemental Table 1.** The association between pre-operative hemoglobin measurement and bleeding, transfusion and mortality.

|             | Overall Population<br>(n=3050) | Preoperative<br>Hemoglobin<br>Measured (n=2722) | No Preoperative<br>Hemoglobin<br>Measured (n=328) | p-value |
|-------------|--------------------------------|-------------------------------------------------|---------------------------------------------------|---------|
| Outcomes:   |                                |                                                 |                                                   |         |
| Hemorrhage  | 33 (1.1)                       | 29 (1.1)                                        | 4 (1.2)                                           | 0.79    |
| Transfusion | 766 (25.0)                     | 694 (25.3)                                      | 76 (23.2)                                         | 0.37    |
| Death       | 111 (3.6)                      | 95 (3.5)                                        | 16 (4.8)                                          | 0.20    |

**Supplemental Table 2.** Association between red blood cell transfusion and long term mortality stratified by severity of anemia, excluding patients with hemorrhage.

|                                | Long Term Mortality, n<br>(%) | Hazard Ratio (95%<br>CI) | P value |
|--------------------------------|-------------------------------|--------------------------|---------|
| <b>Multivariate Analysis**</b> |                               |                          |         |
| <b>Moderate/Severe Anemia</b>  |                               |                          |         |
| Red Blood Cell Transfusion     | 25/102 (24.5%)                | 1.96 (0.61 – 5.05)       | 0.16    |
| No Red Blood Cell Transfusion  | 3/31 (9.7%)                   |                          |         |
| <b>Mild Anemia</b>             |                               |                          |         |
| Red Blood Cell Transfusion     | 17/176 (9.7%)                 | 2.29 (0.91 – 5.75)       | 0.08    |
| No Red Blood Cell Transfusion  | 7/214 (3.3%)                  |                          |         |
| <b>No Anemia</b>               |                               |                          |         |
| Red Blood Cell Transfusion     | 18/390 (4.6%)                 | 4.17 (2.05 – 8.48)       | <0.001  |
| No Red Blood Cell Transfusion  | 20/1781 (1.1%)                |                          |         |

**Supplemental Table 3.** Baseline characteristics of patients with and without perioperative RBCT, pre- and post-propensity score matching.

|                                  | Pre-Matching        |                 |         | Post-Matching      |                 |         |
|----------------------------------|---------------------|-----------------|---------|--------------------|-----------------|---------|
|                                  | No RBCT<br>(n=2284) | RBCT<br>(n=766) | P-value | No RBCT<br>(n=554) | RBCT<br>(n=554) | P-value |
| Age (yr), mean                   | 59.4 ± 12.8         | 65.3 ± 13.6     | <0.001  | 64.1 ± 12.4        | 63.3 ± 13.4     | 0.26    |
| Female                           | 1280 (56.0)         | 526 (68.7)      | <0.001  | 373 (67.3)         | 370 (66.8)      | 0.85    |
| Race                             |                     |                 |         |                    |                 |         |
| White                            | 1470 (64.4)         | 516 (67.4)      |         | 370 (66.8)         | 373 (67.3)      |         |
| Black                            | 327 (14.3)          | 106 (13.8)      | 0.03    | 72 (13.0)          | 83 (15.0)       | 0.12    |
| Hispanic                         | 336 (14.7)          | 78 (10.2)       |         | 74 (13.4)          | 47 (8.5)        |         |
| Other                            | 151 (6.6)           | 66 (8.6)        |         | 38 (6.9)           | 51 (9.2)        |         |
| Admission Type                   |                     |                 |         |                    |                 |         |
| Elective                         | 2206 (96.6)         | 670 (87.5)      | <0.001  | 511 (92.2)         | 506 (91.3)      | 0.58    |
| Emergency or Urgent Surgery      | 78 (3.4)            | 96 (12.5)       |         | 43 (7.8)           | 48 (8.7)        |         |
| Procedure                        |                     |                 |         |                    |                 |         |
| Spine                            | 908 (39.8)          | 236 (30.8)      |         | 169 (30.5)         | 189 (34.1)      |         |
| Knee                             | 757 (33.1)          | 325 (30.7)      | <0.001  | 194 (35.0)         | 171 (30.9)      | 0.27    |
| Hip                              | 619 (27.1)          | 295 (38.5)      |         | 191 (34.5)         | 194 (35.0)      |         |
| RCRI Score                       |                     |                 |         |                    |                 |         |
| Coronary artery disease          | 182 (8.0%)          | 144 (18.8)      | <0.001  | 84 (15.2)          | 85 (15.3)       | 0.93    |
| Heart failure                    | 35 (1.5)            | 51 (6.7)        | <0.001  | 20 (3.6)           | 21 (3.8)        | 0.87    |
| Stroke/Transient Ischemic Attack | 6 (0.3)             | 12 (1.6)        | <0.001  | 4 (0.7)            | 5 (0.9)         | 0.74    |
| Creatinine > 2 mg/dL             | 4 (0.2)             | 11 (1.6)        | <0.001  | 4 (0.7)            | 3 (0.5)         | 0.71    |
| Diabetes Mellitus                | 300 (13.1)          | 145 (18.9)      | <0.001  | 90 (16.2)          | 92 (16.6)       | 0.87    |
| Anemia                           | 247 (12.2)          | 290 (42.0)      | <0.001  | 152 (27.4)         | 176 (31.8)      | 0.11    |
| Perioperative Hemorrhage         | 7 (0.3)             | 26 (3.4)        | <0.001  | 5 (0.9)            | 9 (1.6)         | 0.28    |

**Supplemental Figure 1.** Red blood cell transfusion and long-term mortality following surgery in the propensity matched cohort.

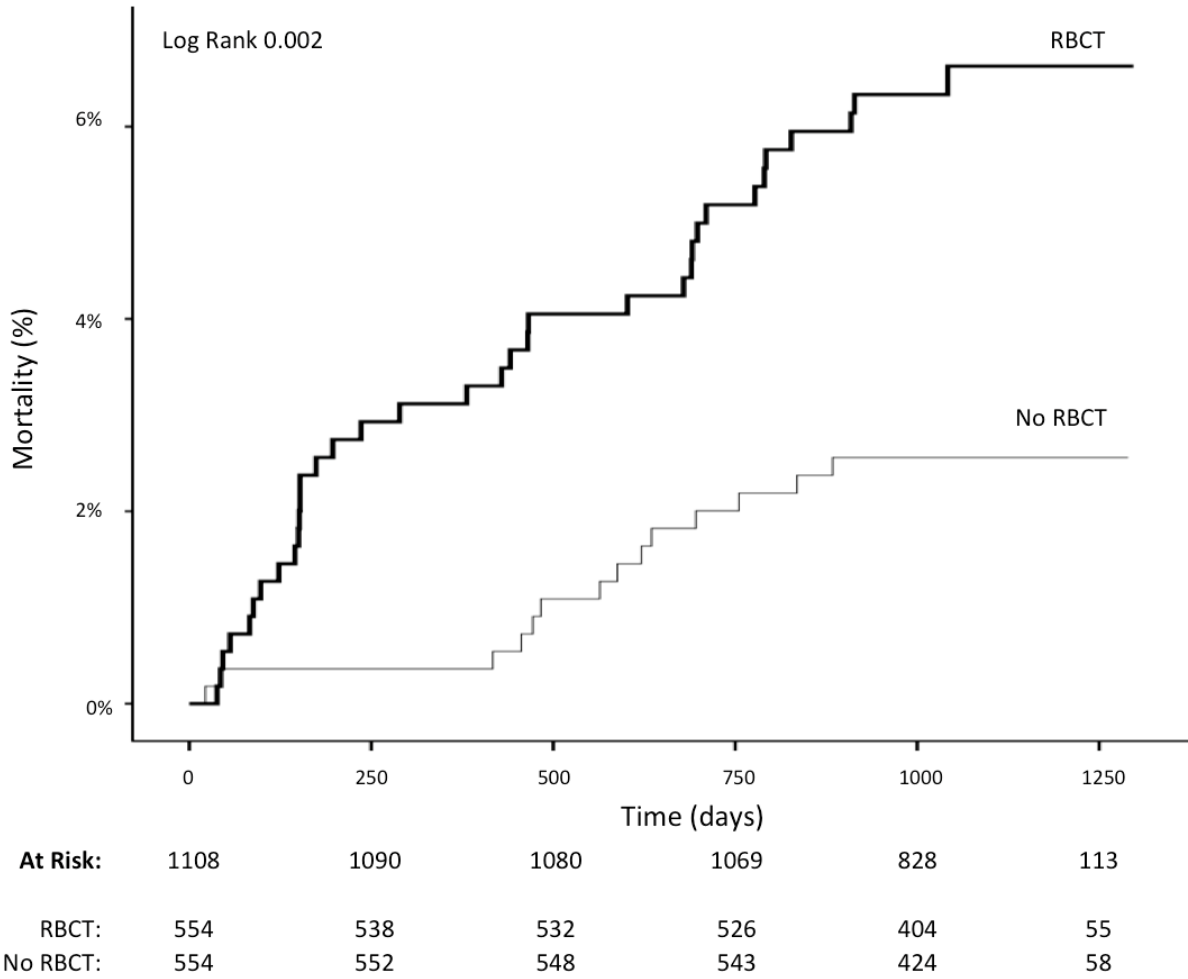

Supplement: NIHMS874691-supplement-supplement_1.pdf [file NIHMS874691-supplement-supplement_1.pdf]
